# Supplementary material
Source: publisher site journal article supplement (https://cdn.jamanetwork.com/ama/content_public/journal/jama/934739/joi150126supp1_prod.pdf)
Supplement: Supplementary file 1 [file joi150126supp1_prod.pdf]

## Supplementary Online Content

Coutinho AJ, Cochrane A, Stelter K, Phillips Jr RL, Peterson LE. Comparison of intended scope of practice for family medicine residents with reported scope of practice among practicing family physicians. *JAMA*. doi:10.1001/jama.2015.13734.

**eTable 1.** American Board of Family Medicine Certification Examination Registration Questionnaire 2014

**eTable 2.** American Board of Family Medicine Maintenance of Certification Examination Registration Questionnaire 2014

**eTable 3.** Characteristics of Recertifying Family Physicians Completing the Procedures Question Set Compared to all Recertifying Physicians

**eTable 4.** Comparison of Intentions to Perform Specific Clinical Activities by Older Initial Certifiers with Recertifiers with 1 to 10 Years of Practice Experience

**eTable 5.** Comparison of Intentions to Perform Specific Clinical Activities by Initial Certifiers with Employment Contracts with Recertifiers with 1 to 10 Years of Practice Experience

This supplementary material has been provided by the authors to give readers additional information about their work.

**eTable 1 - American Board of Family Medicine Certification Examination Registration Questionnaire 2014**

| Question Number | Current Item                                                                                     | Responses                                                                                                                                                                                                                                                                                                                                                         |
|-----------------|--------------------------------------------------------------------------------------------------|-------------------------------------------------------------------------------------------------------------------------------------------------------------------------------------------------------------------------------------------------------------------------------------------------------------------------------------------------------------------|
| 1               | Race                                                                                             | a. American Indian or Alaska Native<br>b. Asian<br>c. Black or African American<br>d. Native Hawaiian or Other Pacific Islander<br>e. White                                                                                                                                                                                                                       |
| 2               | Ethnicity                                                                                        | a. Non-Hispanic<br>b. Hispanic or Latino                                                                                                                                                                                                                                                                                                                          |
| 3               | What was your level of educational debt (undergraduate & graduate) at the end of medical school? | a. None<br>b. Less than \$25,000<br>c. \$25,000-74,999<br>d. \$75,000-149,999<br>e. \$150,000-249,999<br>f. >\$250,000                                                                                                                                                                                                                                            |
| 4               | Did you participate in a loan repayment program?                                                 | a. No<br>b. Yes                                                                                                                                                                                                                                                                                                                                                   |
| 5               | If yes, what type of loan repayment?                                                             | a. J1 Visa<br>b. National Health Service Corps<br>c. Military<br>d. Hospital Sponsored<br>e. Employer Sponsored<br>f. State Sponsored<br>g. Federal Sponsored<br>h. Other (free text)                                                                                                                                                                             |
| 6               | After graduation my primary practice site will be:<br>(select best option)                       | a. Free Standing Ambulatory Clinic<br>b. Hospital Based Clinic<br>c. Urgent Care Clinic<br>d. Emergency Department<br>e. Hospital (e.g Hospitalist)<br>f. Patient's Home<br>g. Nursing home<br>h. Hospice<br>i. Public Health Department<br>j. Work Site<br>k. School<br>l. Correctional Facility<br>m. other (free text)<br>n. Unknown, do not have contract yet |
| 7               | Which of the following describe(s) your                                                          | a. Private solo or group practice                                                                                                                                                                                                                                                                                                                                 |

| Question Number | Current Item                                                                                              | Responses                                                                                                                                                                                                                                                                                                                                                                                                                                                                                                                                                                                                                                                                                                                                                                                                                                                                           |
|-----------------|-----------------------------------------------------------------------------------------------------------|-------------------------------------------------------------------------------------------------------------------------------------------------------------------------------------------------------------------------------------------------------------------------------------------------------------------------------------------------------------------------------------------------------------------------------------------------------------------------------------------------------------------------------------------------------------------------------------------------------------------------------------------------------------------------------------------------------------------------------------------------------------------------------------------------------------------------------------------------------------------------------------|
|                 | primary practice site ownership?<br>(Select one)                                                          | <ul style="list-style-type: none"> <li>b. Freestanding urgent care center</li> <li>c. Hospital emergency department</li> <li>d. Hospital outpatient department</li> <li>e. Ambulatory surgical center</li> <li>f. Industrial outpatient facility</li> <li>g. Mental health center</li> <li>h. Non-federal government clinic (e.g., state, county, city, maternal and child health, etc.)</li> <li>i. Federally Qualified Health Center or Look-Alike</li> <li>j. Rural Health Clinic</li> <li>k. Indian Health Service Institutional setting (School-based Clinic, Nursing home, prison)</li> <li>l. Academic Health Center / Faculty Practice</li> <li>m. Health maintenance organization (e.g., Kaiser Permanente)</li> <li>n. Federal (Military, Veterans Administration/Department of Defense)</li> <li>o. Public Health Service</li> <li>p. Other _____ (Free text)</li> </ul> |
| 8               | At your primary practice site, will you be a full- or part-owner, employee, or an independent contractor? | <ul style="list-style-type: none"> <li>a. Owner</li> <li>b. Employee</li> <li>c. Contractor</li> </ul>                                                                                                                                                                                                                                                                                                                                                                                                                                                                                                                                                                                                                                                                                                                                                                              |
| 9               | I plan on providing the following care in my practice after graduation:<br>(yes / no ) to each            | <ul style="list-style-type: none"> <li>a. Inpatient care</li> <li>b. Acute / Same Day Care</li> <li>c. Chronic Disease Management</li> <li>d. Preventive Services</li> <li>e. Pain management</li> <li>f. Palliative Care</li> <li>g. Office surgery</li> <li>h. Major surgery</li> <li>i. Pre-operative Care</li> <li>j. Post-operative Care</li> <li>k. Sports medicine</li> <li>l. Occupational/Industrial Medicine</li> <li>m. Mental Health</li> <li>n. Musculo-Skeletal problems</li> <li>o. Women's health</li> <li>p. Nursing Home Care</li> <li>q. Home Visits</li> <li>r. Prenatal Care</li> <li>s. Obstetrical Deliveries</li> <li>t. Newborn Care, office</li> <li>u. Newborn Care, nursery</li> </ul>                                                                                                                                                                  |

| Question Number | Current Item                                                                                  | Responses                                                                                                                                                                                                                                                                                                                                                                                                                                                                                                                                            |
|-----------------|-----------------------------------------------------------------------------------------------|------------------------------------------------------------------------------------------------------------------------------------------------------------------------------------------------------------------------------------------------------------------------------------------------------------------------------------------------------------------------------------------------------------------------------------------------------------------------------------------------------------------------------------------------------|
|                 |                                                                                               | v. Care of children<br>p. Other <b>(free text option)</b>                                                                                                                                                                                                                                                                                                                                                                                                                                                                                            |
| 10              | I plan on doing the following procedures in my practice after graduation: (yes / no ) to each | a. Office skin procedures<br>b. Endometrial biopsy<br>c. Simple fracture care<br>d. Central/arterial lines<br>e. Colonoscopy<br>f. Flexible Sigmoidoscopy<br>f. Endoscopy<br>g. Thoracentesis<br>h. Paracentesis<br>i. Lumbar Puncture<br>j. Cardiac stress tests<br>k. Musculoskeletal ultrasound<br>l. Prenatal ultrasound<br>m. Cosmetic procedures (botulinum toxin injection, varicose veins)<br>n. Joint aspiration/injection<br>o. Neonatal Circumcision<br>p. IUD insertion<br>q. implantable long acting contraception insertion or removal |
| 11              | Are you planning on completing a fellowship after residency?                                  | a. Yes<br>b. No<br>c. Unsure                                                                                                                                                                                                                                                                                                                                                                                                                                                                                                                         |
| 12              | Which type of fellowship are you entering? (select only one)                                  | a. Adolescent Medicine<br>b. Geriatrics<br>c. Hospice and Palliative Medicine<br>d. Sleep Medicine<br>e. Sports Medicine<br>f. Academic / Faculty Development<br>g. Addiction Medicine<br>h. Behavioral Medicine<br>i. Emergency Medicine<br>j. HIV Care<br>k. Hospital Medicine<br>l. Integrative Medicine<br>m. International / Global Health<br>n. Maternity Care / OB<br>o. Medical Informatics<br>p. Pain Management<br>q. Preventive Medicine<br>r. Research<br>s. Rural Health                                                                |

| Question Number | Current Item                                                                                                                         | Responses                                                                                                   |
|-----------------|--------------------------------------------------------------------------------------------------------------------------------------|-------------------------------------------------------------------------------------------------------------|
|                 |                                                                                                                                      | t. Women's Health<br>u. Other (free text)                                                                   |
| 13              | If another year of training were available in your residency program, how likely would you be to pursue that?                        | a. Not at all likely<br>b. Somewhat likely<br>c. Moderately likely<br>d. Extremely likely                   |
| 14              | How prepared are you to lead quality improvement projects?                                                                           | a. Not at all prepared<br>b. Somewhat prepared<br>c. Moderately well prepared<br>d. Extremely well prepared |
| 15              | How prepared are you to perform population health management?                                                                        | a. Not at all prepared<br>b. Somewhat prepared<br>c. Moderately well prepared<br>d. Extremely well prepared |
| 16              | How prepared are you to provide care in different settings (e.g., home, nursing home, assisted living)?                              | a. Not at all prepared<br>b. Somewhat prepared<br>c. Moderately well prepared<br>d. Extremely well prepared |
| 17              | How prepared are you to use electronic and other information tools (e.g., registries, decision aids) for managing population health? | a. Not at all prepared<br>b. Somewhat prepared<br>c. Moderately well prepared<br>d. Extremely well prepared |
| 18              | How satisfied are you with the opportunities your program provides to help you develop a comprehensive scope of practice?            | a. Not at all satisfied<br>b. Somewhat satisfied<br>c. Moderately satisfied<br>d. Extremely satisfied       |

**eTable 2 – American Board of Family Medicine Maintenance of Certification Examination Registration Questionnaire 2014**

| Question Number | Item                                                                                                  | Responses                                                                                                                                                                                                                                                                                               |
|-----------------|-------------------------------------------------------------------------------------------------------|---------------------------------------------------------------------------------------------------------------------------------------------------------------------------------------------------------------------------------------------------------------------------------------------------------|
| 1               | Number of Years in Practice                                                                           | free response with <i>auto-fill</i>                                                                                                                                                                                                                                                                     |
| 2               | Race                                                                                                  | a. American Indian or Alaska Native<br>b. Asian<br>c. Black or African American<br>d. Native Hawaiian or Other Pacific Islander<br>e. White                                                                                                                                                             |
| 3               | Ethnicity                                                                                             | a. Non-Hispanic<br>b. Hispanic or Latino                                                                                                                                                                                                                                                                |
| 4               | Percentage of Your Time by Type of Practice of Professional Activity (must total 100%)                | a. Direct patient care<br>b. Research<br>c. Administration<br>d. Teaching                                                                                                                                                                                                                               |
| 5               | a. Primary practice address<br>b. Practice #2 address                                                 | a. Primary practice site address<br>b. Practice #2 address                                                                                                                                                                                                                                              |
| 6               | Percent clinical time in (must total 100%)                                                            | a. Primary practice<br>b. Practice #2                                                                                                                                                                                                                                                                   |
| 7               | Are you a full- or part-owner, employee, or an independent contractor?                                | a. Owner<br>b. Employee<br>c. Contractor                                                                                                                                                                                                                                                                |
| 8               | My primary practice site is: (select best option)                                                     | a. Free Standing Ambulatory Clinic<br>b. Hospital Based Clinic<br>c. Urgent Care Clinic<br>d. Emergency Department<br>e. Hospital<br>f. Patient's Home<br>g. Nursing home<br>h. Hospice<br>i. Public Health Department<br>j. Work Site<br>k. School<br>l. Correctional Facility<br>m. other (free text) |
| 9               | Besides your primary practice site, where else do you routinely see patients? (select all that apply) | a. Free Standing Ambulatory Clinic<br>b. Hospital Based Clinic<br>c. Urgent Care Clinic<br>d. Emergency Department<br>e. Hospital<br>f. Patient's Home                                                                                                                                                  |

| Question Number | Item                                                                                       | Responses                                                                                                                                                                                                                                                                                                                                                                                                                                                                                                                                                                                                                                                                                                                                                                                                                                                                                                                                 |
|-----------------|--------------------------------------------------------------------------------------------|-------------------------------------------------------------------------------------------------------------------------------------------------------------------------------------------------------------------------------------------------------------------------------------------------------------------------------------------------------------------------------------------------------------------------------------------------------------------------------------------------------------------------------------------------------------------------------------------------------------------------------------------------------------------------------------------------------------------------------------------------------------------------------------------------------------------------------------------------------------------------------------------------------------------------------------------|
|                 |                                                                                            | <ul style="list-style-type: none"> <li>g. Nursing home</li> <li>h. Hospice</li> <li>i. Public Health Department</li> <li>j. Work Site</li> <li>k. School</li> <li>l. Correctional Facility</li> <li>m. other (free text)</li> </ul>                                                                                                                                                                                                                                                                                                                                                                                                                                                                                                                                                                                                                                                                                                       |
| 10              | Which of the following describe(s) your primary practice site ownership? (Select one)      | <ul style="list-style-type: none"> <li>a. Private solo or group practice</li> <li>b. Freestanding urgent care center</li> <li>c. Hospital emergency department</li> <li>d. Hospital outpatient department</li> <li>e. Ambulatory surgical center</li> <li>f. Industrial outpatient facility</li> <li>g. Mental health center</li> <li>h. Non-federal government clinic (e.g., state, county, city, maternal and child health, etc.)</li> <li>i. Federally Qualified Health Center or Look-Alike</li> <li>j. Rural Health Clinic</li> <li>k. Indian Health Service</li> <li>l. Institutional setting (School-based Clinic, Nursing home, prison)</li> <li>m. Academic Health Center / Faculty Practice</li> <li>n. Health maintenance organization (e.g., Kaiser Permanente)</li> <li>o. Federal (Military, Veterans Administration/Department of Defense)</li> <li>p. Public Health Service</li> <li>q. Other ____ (Free text)</li> </ul> |
| 11              | Which of the following describes your primary practice site size? (Select one)             | <ul style="list-style-type: none"> <li>a. Solo practice</li> <li>b. Small (2-5 Providers)</li> <li>c. Medium (6-20 Providers)</li> <li>d. Large (&gt;20 Providers)</li> <li>e. Other free text</li> </ul>                                                                                                                                                                                                                                                                                                                                                                                                                                                                                                                                                                                                                                                                                                                                 |
| 12              | Which of the following describes your primary practice site specialty mix?                 | <ul style="list-style-type: none"> <li>a. Single specialty</li> <li>b. Multi-specialty</li> </ul>                                                                                                                                                                                                                                                                                                                                                                                                                                                                                                                                                                                                                                                                                                                                                                                                                                         |
| 13              | The following types of providers work in my primary practice site: (Select all that apply) | <ul style="list-style-type: none"> <li>a. Nurse Practitioner or Advanced Practice Nurse</li> <li>b. Registered Nurse</li> <li>c. Licensed Practice Nurse</li> <li>d. Physician Assistant</li> <li>e. Behavioral Specialist, non-MD</li> <li>f. Social Worker</li> <li>g. Psychiatrist</li> <li>h. Physical or Occupational Therapist</li> <li>i. Certified Nurse Midwife</li> <li>j. PharmD or Pharmacist</li> <li>k. n/a</li> </ul>                                                                                                                                                                                                                                                                                                                                                                                                                                                                                                      |

| Question Number | Item                                                                                                                   | Responses                                                                                                                                                                                                                                                                                                                                                                                                                                                                                                                                                     |
|-----------------|------------------------------------------------------------------------------------------------------------------------|---------------------------------------------------------------------------------------------------------------------------------------------------------------------------------------------------------------------------------------------------------------------------------------------------------------------------------------------------------------------------------------------------------------------------------------------------------------------------------------------------------------------------------------------------------------|
| 14              | Do you provide the following?<br>(Yes / no for each option)                                                            | <ul style="list-style-type: none"> <li>a. Inpatient care</li> <li>b. Acute / Same Day Care</li> <li>c. Chronic Disease Management</li> <li>d. Preventive Services</li> <li>e. Pain management</li> <li>f. Palliative Care</li> <li>g. Office surgery</li> <li>h. Major surgery</li> <li>i. Pre-operative Care</li> <li>j. Post-operative Care</li> <li>k. Sports Medicine</li> <li>l. Occupational/Industrial Medicine</li> <li>m. Mental Health</li> <li>n. Musculo-Skeletal Care</li> <li>o. Women's health</li> <li>p. Other (free text option)</li> </ul> |
| 15              | Do you see patients who are in the following age ranges? (Yes/No)                                                      | <ul style="list-style-type: none"> <li>a. Age &lt; 5</li> <li>b. Age 5-12</li> <li>c. Age 13-18</li> <li>d. Age 19-64</li> <li>e. Age 65-74</li> <li>f. Age 75 and older</li> </ul>                                                                                                                                                                                                                                                                                                                                                                           |
| 16              | Do you use a language other than English to interact with patients?                                                    | <ul style="list-style-type: none"> <li>a. Yes, Spanish</li> <li>b. Yes, Other (free text option)</li> <li>c. No</li> </ul>                                                                                                                                                                                                                                                                                                                                                                                                                                    |
| 17              | Are you a member of a medical school faculty?                                                                          | <ul style="list-style-type: none"> <li>a. No</li> <li>b. Yes, Part-time</li> <li>c. Yes, Full-time</li> </ul>                                                                                                                                                                                                                                                                                                                                                                                                                                                 |
| 18              | Are you a member of a residency faculty?                                                                               | <ul style="list-style-type: none"> <li>a. No</li> <li>b. Yes, Part-time</li> <li>c. Yes, Full-time</li> </ul>                                                                                                                                                                                                                                                                                                                                                                                                                                                 |
| 19              | HOW MANY OBSTETRICAL DELIVERIES DO YOU DO PER YEAR?                                                                    | <ul style="list-style-type: none"> <li>a. None</li> <li>b. 1 to 25</li> <li>c. 26 to 50</li> <li>d. More than 50</li> </ul>                                                                                                                                                                                                                                                                                                                                                                                                                                   |
| 20              | Do you perform the following types of deliveries?<br>yes / no                                                          | <ul style="list-style-type: none"> <li>a. Normal spontaneous vaginal deliveries</li> <li>b. Operative vaginal deliveries (forceps / vacuum)</li> <li>c. Caesarian deliveries</li> </ul>                                                                                                                                                                                                                                                                                                                                                                       |
| 21              | Which of the following best describes what happens when one of your patients becomes pregnant?<br>(select best option) | <ul style="list-style-type: none"> <li>a. I Manage Prenatal Care and Deliver</li> <li>b. I Manage Prenatal Care and Coordinate Delivery with Other Providers</li> <li>c. I Manage Non-Pregnancy Related Issues, and Refer the Patient to Other Providers Who Will Follow the Pregnancy</li> </ul>                                                                                                                                                                                                                                                             |

| Question Number | Item                                                                                                                                                                                         | Responses                                                                                                                                                                                                                                                                                                                                                                                                                                                                                                                                            |
|-----------------|----------------------------------------------------------------------------------------------------------------------------------------------------------------------------------------------|------------------------------------------------------------------------------------------------------------------------------------------------------------------------------------------------------------------------------------------------------------------------------------------------------------------------------------------------------------------------------------------------------------------------------------------------------------------------------------------------------------------------------------------------------|
|                 |                                                                                                                                                                                              | d. I Refer the Patient to Other Providers Who Will Follow The Pregnancy and Manage All Non-Pregnancy Related Problems                                                                                                                                                                                                                                                                                                                                                                                                                                |
| 22              | Do you take care of newborn infants?                                                                                                                                                         | a. Yes, office<br>b. Yes, nursery<br>c. Yes, both<br>d. No                                                                                                                                                                                                                                                                                                                                                                                                                                                                                           |
| 23              | Do you have admitting privileges in any hospital?                                                                                                                                            | a. Yes<br>b. No                                                                                                                                                                                                                                                                                                                                                                                                                                                                                                                                      |
| 24              | When one of your adult patients is admitted to the hospital for a medical condition, which of the following <i>best describes</i> your typical role in managing the patient in the hospital? | a. I Manage the Patient Personally<br>b. You or one of Your Partners Manages the Patient<br>c. A Hospitalist Group Manages the Patient<br>d. Other <u>free text</u><br>e. Not Applicable, I am a hospitalist<br>f. Not Applicable                                                                                                                                                                                                                                                                                                                    |
| 25              | If you are certified by another ABMS primary specialty board, please indicate                                                                                                                | 23 options for all other ABMS primary boards                                                                                                                                                                                                                                                                                                                                                                                                                                                                                                         |
| 26              | Approximately what is the size of your patient panel?                                                                                                                                        | a. Free text entry for number<br>b. I don't know<br>c. Does not apply                                                                                                                                                                                                                                                                                                                                                                                                                                                                                |
| 26              | Patient Centered Medical Home (PCMH) Yes/No                                                                                                                                                  | a. Is your practice a certified PCMH?<br>b. If not, are you considering applying? (only available if answers no to a)                                                                                                                                                                                                                                                                                                                                                                                                                                |
| 27              | Do you use an electronic medical record system at your primary practice site?                                                                                                                | a. Yes<br>b. No                                                                                                                                                                                                                                                                                                                                                                                                                                                                                                                                      |
| Module 4        | I regularly perform the following procedures:<br>Yes/No                                                                                                                                      | a. Office skin procedures<br>b. Endometrial biopsy<br>c. Simple fracture care<br>d. Central/arterial lines<br>e. Colonoscopy<br>f. Flexible Sigmoidoscopy<br>f. Endoscopy<br>g. Thoracentesis<br>h. Paracentesis<br>i. Lumbar Puncture<br>j. Cardiac stress tests<br>k. Musculoskeletal ultrasound<br>l. Prenatal ultrasound<br>m. Cosmetic procedures (botulinum toxin injection, varicose veins)<br>n. Joint aspiration/injection<br>o. Neonatal Circumcision<br>p. IUD insertion<br>q. implantable long acting contraception insertion or removal |

**eTable 3 – Characteristics of Recertifying Family Physicians Completing the Procedures Question Set Compared to all Recertifying Physicians**

|                                                        | Question Set 1<br>(n=2699) |                        | Question Set 2<br>(n=2707) |                        | Question Set 3<br>(n=2726) |                        | Question Set 4<br>(Procedure Module)<br>(n=2714) |                        | All Recertifiers<br>(n=10846) |                        | P-value <sup>a</sup> |
|--------------------------------------------------------|----------------------------|------------------------|----------------------------|------------------------|----------------------------|------------------------|--------------------------------------------------|------------------------|-------------------------------|------------------------|----------------------|
| Mean Age<br>(95%<br>Confidence<br>Interval)            | 51.1 (50.8-51.4)           |                        | 51.4 (51.1-51.8)           |                        | 50.9 (50.6-51.2)           |                        | 51.5 (51.2-51.8)                                 |                        | 51.2 (51.1-51.4)              |                        | 0.03                 |
| Mean<br>Scope<br>Score (95%<br>Confidence<br>Interval) | 15.4 (15.3-15.5)           |                        | 15.5 (15.3-15.6)           |                        | 15.5 (15.4-15.6)           |                        | 15.4 (15.3-15.5)                                 |                        | 15.5 (15.4-15.5)              |                        | 0.42                 |
|                                                        | Total<br>Number            | Percentage<br>(95% CI) | Total<br>Number            | Percentage<br>(95% CI) | Total<br>Number            | Percentage<br>(95% CI) | Total<br>Number                                  | Percentage<br>(95% CI) | Total<br>Number               | Percentage<br>(95% CI) |                      |
| Male<br>Gender                                         | 1667                       | 61.8 (59.9-<br>63.6)   | 1712                       | 63.2 (61.4-<br>65.1)   | 1708                       | 62.7 (60.8-<br>64.5)   | 1730                                             | 63.7 (61.9-<br>65.6)   | 6817                          | 62.9 (61.9-<br>63.8)   | 0.47                 |
| MD Degree                                              | 2449                       | 90.7 (89.6-<br>91.8)   | 2466                       | 91.1 (90.0-<br>92.2)   | 2453                       | 90.0 (88.9-<br>91.1)   | 2461                                             | 90.7 (89-<br>58-91.77) | 9829                          | 90.6 (90.1-<br>91.2)   | 0.56                 |
| International<br>Medical<br>Graduate <sup>b</sup>      | 510                        | 19.0 (17.5-<br>20.5)   | 511                        | 19.1 (17.6-<br>20.5)   | 519                        | 19.2 (17.7-<br>20.7)   | 562                                              | 20.8 (19.3-<br>22.4)   | 2102                          | 19.5 (18.8-<br>20.3)   | 0.27                 |
| Years in<br>Practice                                   |                            |                        |                            |                        |                            |                        |                                                  |                        |                               |                        |                      |
| 1 - 10                                                 | 668                        | 24.7 (23.1-<br>26.4)   | 672                        | 24.8 (23.2-<br>26.5)   | 712                        | 26.1 (24.5-<br>27.8)   | 695                                              | 25.6 (24.0-<br>27.3)   | 2747                          | 25.3 (14.5-<br>26.1)   |                      |
| 11 – 20                                                | 939                        | 34.8 (33.0-<br>36.6)   | 917                        | 22.9 (32.1-<br>35.7)   | 980                        | 36.0 (34.1-<br>37.8)   | 909                                              | 33.5 (31.7-<br>35.3)   | 3745                          | 34.5 (33.6-<br>35.4)   | 0.27                 |
| 21-30                                                  | 804                        | 29.8 (28.1-<br>31.5)   | 799                        | 29.5 (27.8-<br>31.2)   | 739                        | 27.1 (25.4-<br>28.8)   | 789                                              | 29.1 (27.4-<br>30.8)   | 3131                          | 28.9 (28.0-<br>29.74)  |                      |
| 31+                                                    | 288                        | 10.7 (9.5-<br>11.8)    | 319                        | 11.8 (10.6-<br>13.0)   | 295                        | 10.8 (9.7-<br>12.0)    | 321                                              | 11.8 (10.6-<br>13.0)   | 1223                          | 11.3 (10.7-<br>11.9)   |                      |

<sup>a</sup>P-value represents test for difference between modules with either ANOVA or Chi-Square tests.

<sup>b</sup>International Medical Graduate data is missing for 84 participants.

**eTable 4 – Comparison of Intentions to Perform Specific Clinical Activities by Older Initial Certifiers with Recertifiers with 1 to 10 Years of Practice Experience**

| Type of Service                            | Certifier<br>Age ≥ 38<br>(n=320) |                     | Recertifier<br>1-10 Years of Practice<br>(n=2747) |                     | P-Value <sup>a</sup> |
|--------------------------------------------|----------------------------------|---------------------|---------------------------------------------------|---------------------|----------------------|
| Mean Scope Score (95% Confidence Interval) | 17.6 (17.2-18.0)                 |                     | 15.3 (15.2-15.4)                                  |                     | <0.001               |
|                                            | Total Number                     | Percentage (95% CI) | Total Number                                      | Percentage (95% CI) |                      |
| Acute/Same Day Care                        | 296                              | 92.5 (89.6-95.4)    | 2496                                              | 90.9 (89.8-91.9)    | 0.33                 |
| Chronic Disease Management                 | 296                              | 92.5 (89.6-95.4)    | 2386                                              | 86.9 (85.6-88.1)    | 0.004                |
| Preventive Services                        | 297                              | 92.8 (90.0-95.6)    | 2371                                              | 86.3 (85.0-87.6)    | 0.001                |
| Obstetrical Care                           | 68                               | 21.3 (16.8-25.7)    | 252                                               | 9.2 (8.1-10.3)      | <0.001               |
| Prenatal Care                              | 169                              | 52.8 (47.3-58.3)    | 333                                               | 12.1 (10.9-13.3)    | <0.001               |
| Newborn Care                               | 230                              | 71.9 (66.9-76.8)    | 1523                                              | 55.4 (53.6-57.3)    | <0.001               |
| Pediatric Care                             | 281                              | 87.8 (84.2-91.4)    | 2428                                              | 88.4 (87.2-89.6)    | 0.76                 |
| Women's Health                             | 272                              | 85.0 (81.1-88.9)    | 2206                                              | 80.3 (78.8-81.8)    | 0.04                 |
| Mental Health                              | 233                              | 72.8 (67.9-77.7)    | 2126                                              | 77.4 (75.8-79.0)    | 0.07                 |
| Musculoskeletal Care                       | 289                              | 90.3 (87.1-93.6)    | 2468                                              | 89.8 (88.7-91.0)    | 0.79                 |
| Sports Medicine                            | 204                              | 63.8 (58.5-69.0)    | 1743                                              | 63.5 (61.6-65.3)    | 0.91                 |
| Occupational Medicine                      | 145                              | 45.3 (39.9-50.8)    | 935                                               | 34.0 (32.3-35.8)    | <0.001               |
| Office Surgery                             | 216                              | 67.5 (62.4-72.6)    | 1594                                              | 58.0 (56.2-59.9)    | 0.001                |
| Pre-Operative Care                         | 244                              | 76.3 (71.6-80.9)    | 1988                                              | 72.4 (70.7-74.0)    | 0.14                 |
| Post-Operative Care                        | 179                              | 55.9 (50.5-61.4)    | 1141                                              | 41.5 (39.7-43.4)    | <0.001               |
| Major Surgery                              | 17                               | 5.3 (2.9-7.8)       | 85                                                | 3.1 (2.4-3.7)       | 0.04                 |
| Inpatient Care                             | 200                              | 62.5 (57.2-67.8)    | 926                                               | 33.7 (31.9-35.5)    | <0.001               |
| Pain Management                            | 208                              | 65.0 (59.8-70.2)    | 1722                                              | 62.7 (60.9-64.5)    | 0.42                 |
| Palliative Care                            | 174                              | 54.4 (48.9-59.8)    | 1234                                              | 44.9 (43.1-46.8)    | 0.001                |
| Nursing Home Care                          | 164                              | 51.3 (45.8-56.7)    | 322                                               | 11.7 (10.5-12.9)    | <0.001               |
| Home Visits                                | 168                              | 52.5 (47.0-58.0)    | 171                                               | 6.2 (5.3-7.1)       | <0.001               |

<sup>a</sup>All p-values for differences in means or percentages (t-tests and Chi-square tests) were for comparisons between categories of certifiers.

**eTable 5 – Comparison of Intentions to Perform Specific Clinical Activities by Initial Certifiers with Employment Contracts with Recertifiers with 1 to 10 Years of Practice Experience**

| Type of Service            | Initial Certifier<br>With Employment Contract<br>(n=1891) |                     | Recertifier with<br>1-10 Years of Practice Experience<br>(n=2747) |                     | P-Value <sup>a</sup> |
|----------------------------|-----------------------------------------------------------|---------------------|-------------------------------------------------------------------|---------------------|----------------------|
|                            | Mean Scope Score (95%<br>Confidence Interval)             |                     |                                                                   |                     |                      |
|                            |                                                           | 17.6 (17.4-17.8)    |                                                                   | 15.3 (15.2-15.4)    | <.001                |
|                            | Total Number                                              | Percentage (95% CI) | Total Number                                                      | Percentage (95% CI) |                      |
| Acute/Same Day Care        | 1761                                                      | 93.1 (92.0-94.3)    | 2496                                                              | 90.9 (89.8-91.9)    | 0.005                |
| Chronic Disease Management | 1772                                                      | 93.7 (92.6-94.8)    | 2386                                                              | 86.9 (85.6-88.1)    | <.001                |
| Preventive Services        | 1785                                                      | 94.4 (93.3-95.4)    | 2371                                                              | 86.3 (85.0-87.6)    | <.001                |
| Obstetrical Care           | 423                                                       | 22.4 (20.5-24.2)    | 252                                                               | 9.2 (8.1-10.3)      | <.001                |
| Prenatal Care              | 887                                                       | 46.9 (44.7-49.2)    | 333                                                               | 12.1 (10.9-13.3)    | <.001                |
| Newborn Care               | 1470                                                      | 77.7 (75.9-79.6)    | 1523                                                              | 55.4 (53.6-57.3)    | <.001                |
| Pediatric Care             | 1686                                                      | 89.2 (87.8-90.6)    | 2428                                                              | 88.4 (87.2-89.6)    | 0.41                 |
| Women's Health             | 1632                                                      | 86.3 (84.8-87.9)    | 2206                                                              | 80.3 (78.8-81.8)    | <.001                |
| Mental Health              | 1543                                                      | 81.6 (79.8-83.3)    | 2126                                                              | 77.4 (75.8-79.0)    | <.001                |
| Musculoskeletal Care       | 1759                                                      | 93.0 (91.9-94.2)    | 2468                                                              | 89.8 (88.7-91.0)    | <.001                |
| Sports Medicine            | 1420                                                      | 75.1 (73.1-77.0)    | 1743                                                              | 63.5 (61.6-65.3)    | <.001                |
| Occupational Medicine      | 799                                                       | 42.3 (40.0-44.4)    | 935                                                               | 34.0 (32.3-35.8)    | <.001                |
| Office Surgery             | 1230                                                      | 65.0 (62.9-67.2)    | 1594                                                              | 58.0 (56.2-59.9)    | <.001                |
| Pre-Operative Care         | 1478                                                      | 78.2 (76.3-80.0)    | 1988                                                              | 72.4 (70.7-74.0)    | <.001                |
| Post-Operative Care        | 923                                                       | 48.8 (46.6-51.1)    | 1141                                                              | 41.5 (39.7-43.4)    | <.001                |
| Major Surgery              | 82                                                        | 4.3 (3.4-5.3)       | 85                                                                | 3.1 (2.4-3.7)       | 0.03                 |
| Inpatient Care             | 1036                                                      | 54.8 (52.5-57.0)    | 926                                                               | 33.7 (31.9-35.5)    | <.001                |
| Pain Management            | 1216                                                      | 64.3 (62.1-66.4)    | 1722                                                              | 62.7 (60.9-64.5)    | 0.26                 |
| Palliative Care            | 978                                                       | 51.7 (49.5-54.0)    | 1234                                                              | 44.9 (43.1-46.8)    | <.001                |
| Nursing Home Care          | 695                                                       | 36.8 (34.6-38.9)    | 322                                                               | 11.7 (10.5-12.9)    | <.001                |
| Home Visits                | 782                                                       | 41.4 (39.1-43.6)    | 171                                                               | 6.2 (5.3-7.1)       | <.001                |

<sup>a</sup>All p-values for differences in means or percentages (t-tests and Chi-square tests) were for comparisons between categories of certifiers.
